# Supplementary material for: Maternal Iodine Intake and Offspring Attention-Deficit/Hyperactivity Disorder: Results from a Large Prospective Cohort Study
Source: PubMed Central journal article supplement (PMC5707711; doi:10.3390/nu9111239), 2017-11-13
Supplement: nutrients-09-01239-s001.pdf [file nutrients-09-01239-s001.pdf]

ONLINE SUPPORTING MATERIAL

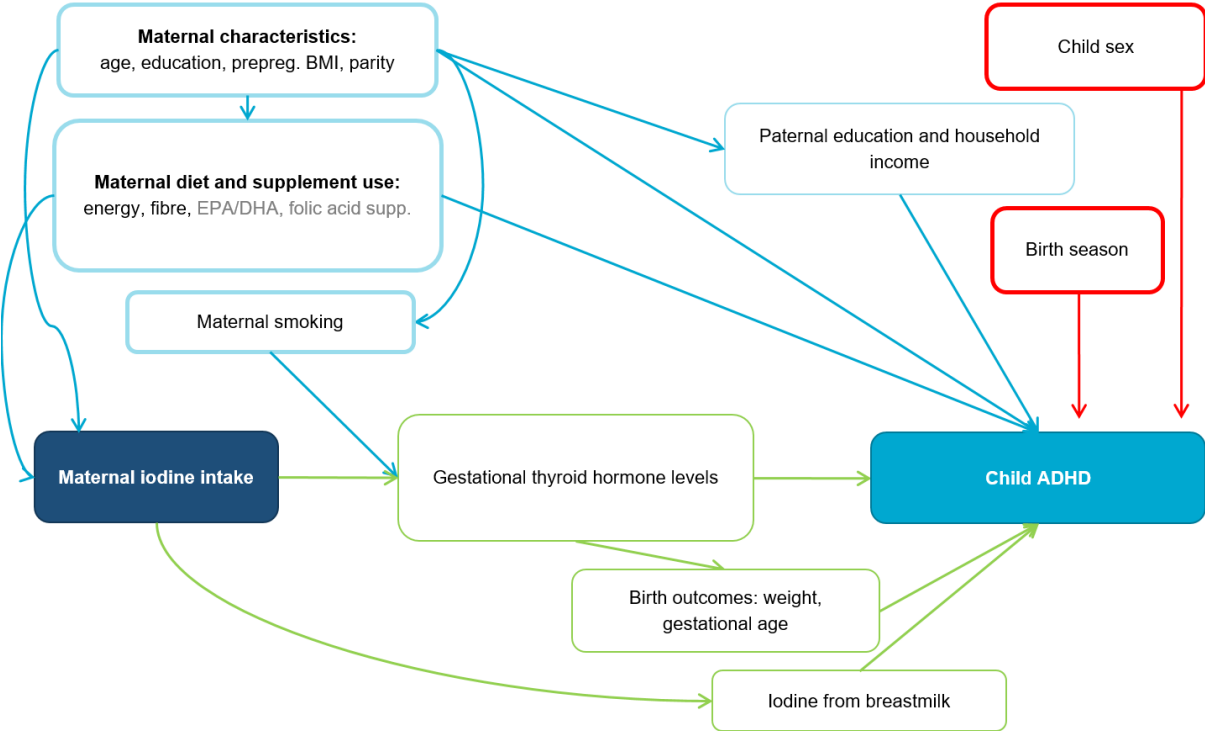

**Figure S1** Conceptual model (simplified directed acyclic diagram (DAG))

The association between maternal iodine intake and child ADHD. Potential causal pathways are illustrated in green and confounding pathways in blue. Important determinants of the outcome are in red. Intake of the n-3 fatty acids EPA and DHA and reported use of folic acid supplements were only included as confounders when iodine from supplements was the exposure.

**Table S1** Associations between maternal iodine intake from food in participants who did not report use of supplemental iodine in the FFQ and risk of child ADHD diagnosis ( $n=53,360$ )<sup>1</sup>

|                                | ADHD<br>Crude model | ADHD<br>Adjusted model <sup>1</sup> |
|--------------------------------|---------------------|-------------------------------------|
| <b>Iodine from food, µg/d:</b> |                     |                                     |
| 25                             | 1.44 (1.05, 1.97)   | 1.09 (0.81, 1.46)                   |
| 50                             | 1.24 (1.00, 1.53)   | 1.04 (0.85, 1.27)                   |
| 75                             | 1.07 (0.92, 1.25)   | 0.99 (0.85, 1.15)                   |
| 100                            | 0.97 (0.84, 1.12)   | 0.97 (0.84, 1.12)                   |
| 125                            | 0.96 (0.88, 1.05)   | 0.97 (0.89, 1.07)                   |
| 160 (ref)                      | 1                   | 1                                   |
| 200                            | 1.04 (0.98, 1.09)   | 1.01 (0.97, 1.07)                   |
| 225                            | 1.05 (0.97, 1.14)   | 1.02 (0.94, 1.10)                   |
| 250                            | 1.07 (0.95, 1.20)   | 1.02 (0.91, 1.15)                   |
| 300                            | 1.10 (0.90, 1.34)   | 1.02 (0.83, 1.25)                   |
| 350                            | 1.14 (0.86, 1.51)   | 1.03 (0.77, 1.37)                   |
| 400                            | 1.17 (0.81, 1.69)   | 1.03 (0.71, 1.50)                   |
| <i>p</i> -overall              | <i>p</i> =0.09      | <i>p</i> =0.89                      |

<sup>1</sup> Values are hazard ratios (95% CIs) unless otherwise indicated. Both models (including crude model) were adjusted for random effects of sibling clusters and for energy intake to control for measurement error. Adjusted model was additionally adjusted for maternal age, BMI, parity, education, smoking in pregnancy, and fiber intake.

Abbreviation: FFQ, Food frequency questionnaire

**Table S2** Association between maternal iodine intake from food in participants who did not report use of supplemental iodine in the FFQ) and score on maternally reported ADHD-symptoms at age 8 y ( $n=19\ 086$ )<sup>1</sup>

|                                | ADHD score<br>Crude model | ADHD score<br>Adjusted model | Inattention score<br>Crude model | Inattention score<br>Adjusted model | Hyperactivity score<br>Crude model | Hyperactivity score<br>Adjusted model |
|--------------------------------|---------------------------|------------------------------|----------------------------------|-------------------------------------|------------------------------------|---------------------------------------|
| <b>Iodine from food, µg/d:</b> |                           |                              |                                  |                                     |                                    |                                       |
| 25                             | 0.09 ( 0.03, 0.16)        | 0.05 (-0.02, 0.12)           | 0.10 ( 0.03, 0.17)               | 0.06 (-0.00, 0.13)                  | 0.07 (-0.02, 0.16)                 | 0.03 (-0.06, 0.11)                    |
| 50                             | 0.08 ( 0.04, 0.13)        | 0.06 ( 0.01, 0.10)           | 0.09 ( 0.05, 0.14)               | 0.07 ( 0.02, 0.11)                  | 0.06 ( 0.01, 0.12)                 | 0.04 (-0.02, 0.09)                    |
| 75                             | 0.07 ( 0.04, 0.10)        | 0.06 ( 0.03, 0.09)           | 0.08 ( 0.05, 0.11)               | 0.07 ( 0.04, 0.10)                  | 0.06 ( 0.01, 0.10)                 | 0.04 ( 0.00, 0.09)                    |
| 100                            | 0.06 ( 0.02, 0.09)        | 0.05 ( 0.02, 0.09)           | 0.06 ( 0.03, 0.10)               | 0.06 ( 0.03, 0.09)                  | 0.04 ( 0.00, 0.08)                 | 0.04 ( 0.00, 0.08)                    |
| 125                            | 0.03 ( 0.01, 0.05)        | 0.03 ( 0.01, 0.05)           | 0.03 ( 0.02, 0.05)               | 0.04 ( 0.02, 0.06)                  | 0.02 (-0.00, 0.05)                 | 0.03 ( 0.00, 0.05)                    |
| 160 (ref)                      | 0                         | 0                            | 0                                | 0                                   | 0                                  | 0                                     |
| 200                            | -0.01 (-0.02, 0.00)       | -0.01 (-0.03, -0.00)         | -0.01 (-0.02, 0.00)              | -0.02 (-0.03, -0.00)                | -0.01 (-0.02, 0.01)                | -0.01 (-0.03, 0.00)                   |
| 225                            | -0.00 (-0.03, 0.02)       | -0.02 (-0.04, 0.01)          | -0.01 (-0.03, 0.02)              | -0.02 (-0.04, 0.00)                 | -0.00 (-0.03, 0.03)                | -0.01 (-0.04, 0.02)                   |
| 250                            | 0.00 (-0.03, 0.04)        | -0.01 (-0.05, 0.02)          | 0.00 (-0.03, 0.04)               | -0.02 (-0.05, 0.02)                 | 0.00 (-0.04, 0.05)                 | -0.01 (-0.05, 0.03)                   |
| 300                            | 0.02 (-0.04, 0.08)        | -0.01 (-0.07, 0.05)          | 0.02 (-0.04, 0.08)               | -0.02 (-0.07, 0.04)                 | 0.01 (-0.06, 0.09)                 | -0.01 (-0.08, 0.07)                   |
| 350                            | 0.03 (-0.05, 0.12)        | -0.01 (-0.09, 0.08)          | 0.03 (-0.05, 0.12)               | -0.01 (-0.10, 0.07)                 | 0.03 (-0.09, 0.14)                 | -0.01 (-0.11, 0.10)                   |
| 400                            | 0.05 (-0.06, 0.16)        | -0.00 (-0.12, 0.11)          | 0.05 (-0.06, 0.16)               | -0.01 (-0.12, 0.10)                 | 0.04 (-0.11, 0.18)                 | -0.00 (-0.14, 0.14)                   |
| <i>p</i> -overall              | <i>p</i> <0.001           | <i>p</i> =0.001              | <i>p</i> <0.001                  | <i>p</i> <0.001                     | <i>p</i> =0.08                     | <i>p</i> =0.16                        |
| <i>p</i> -non linearity        | <i>p</i> =0.010           | <i>p</i> =0.09               | <i>p</i> =0.005                  | <i>p</i> =0.043                     |                                    |                                       |

<sup>1</sup> Values are standardized beta coefficients (95% CIs) unless otherwise indicated. Both models (including crude model) were adjusted for random effects of sibling clusters and for energy intake to control for measurement error. Adjusted model was additionally adjusted for maternal age, BMI, parity, education, smoking in pregnancy, fiber intake, child sex, and birth season.

Abbreviation: FFQ, Food frequency questionnaire

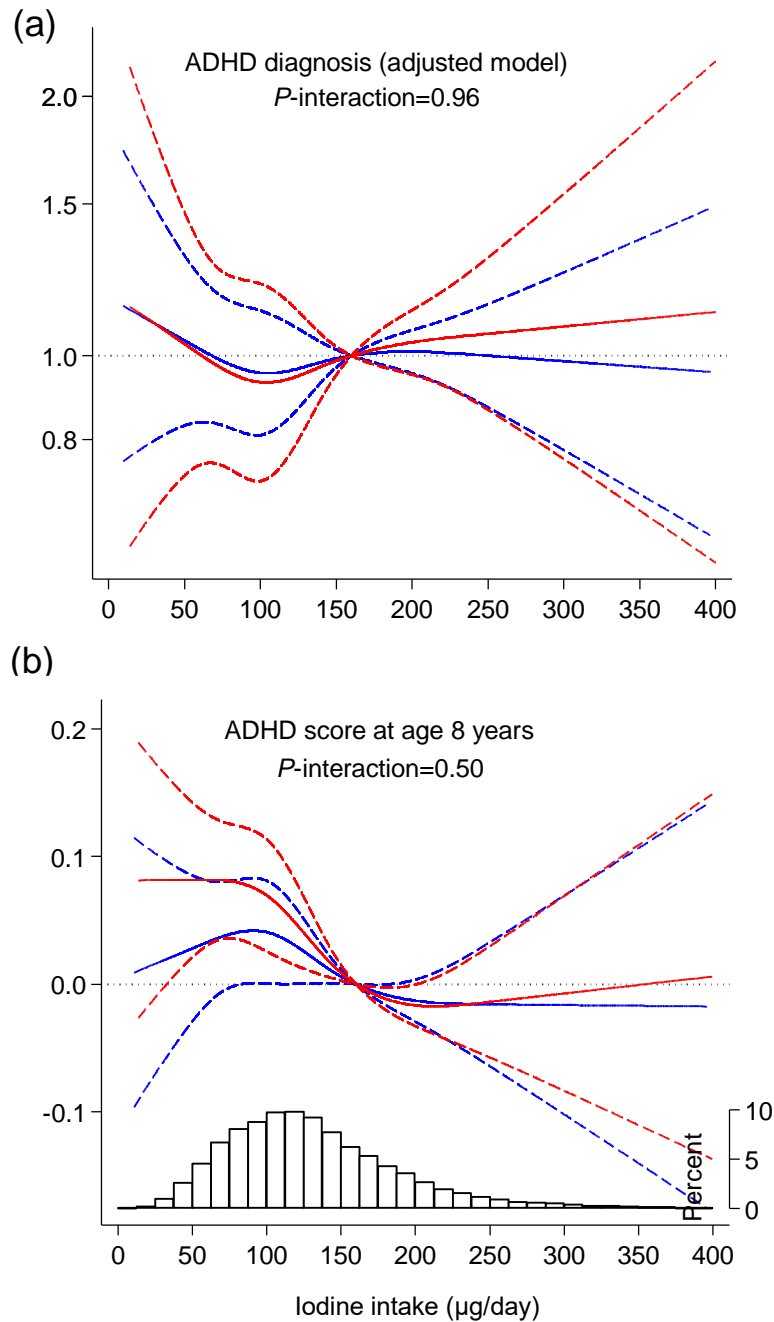

**Figure S2** Sex specific associations between maternal iodine intake from food (in non-supplement users) and child ADHD

Estimated associations for boys in blue and girls in red. The models included an interaction term between gender and iodine intake. Solid lines represent restricted cubic splines (knotpositions at 54, 102, 143 and 245  $\mu\text{g}/\text{d}$ ), 95% CI are illustrated by dotted lines, and the reference level was set to 160  $\mu\text{g}/\text{d}$  (the estimated average requirement of iodine in pregnancy by the Institute of Medicine). The histogram in (b) illustrates the distribution of maternal iodine intake. The models (a) and (b) were adjusted for maternal age, body mass index, parity (0, 1,  $\geq 2$ ), education ( $\leq 12$ , 13-16,  $\geq 17$  years), smoking in pregnancy (never, occasionally or quit before gestational week 12, daily), energy intake, fiber intake, and for random effects of sibling clusters. Model (b) was additionally adjusted for birth season.
